# Supplementary material for: Group I Paks as therapeutic targets in NF2-deficient meningioma
Source: PubMed Central journal article supplement (PMC4385830; doi:10.18632/oncotarget.2810), 2015-01-24
Supplement: oncotarget-06-1981-s001.pdf [file oncotarget-06-1981-s001.pdf]

## SUPPLEMENTARY FIGURES AND TABLE

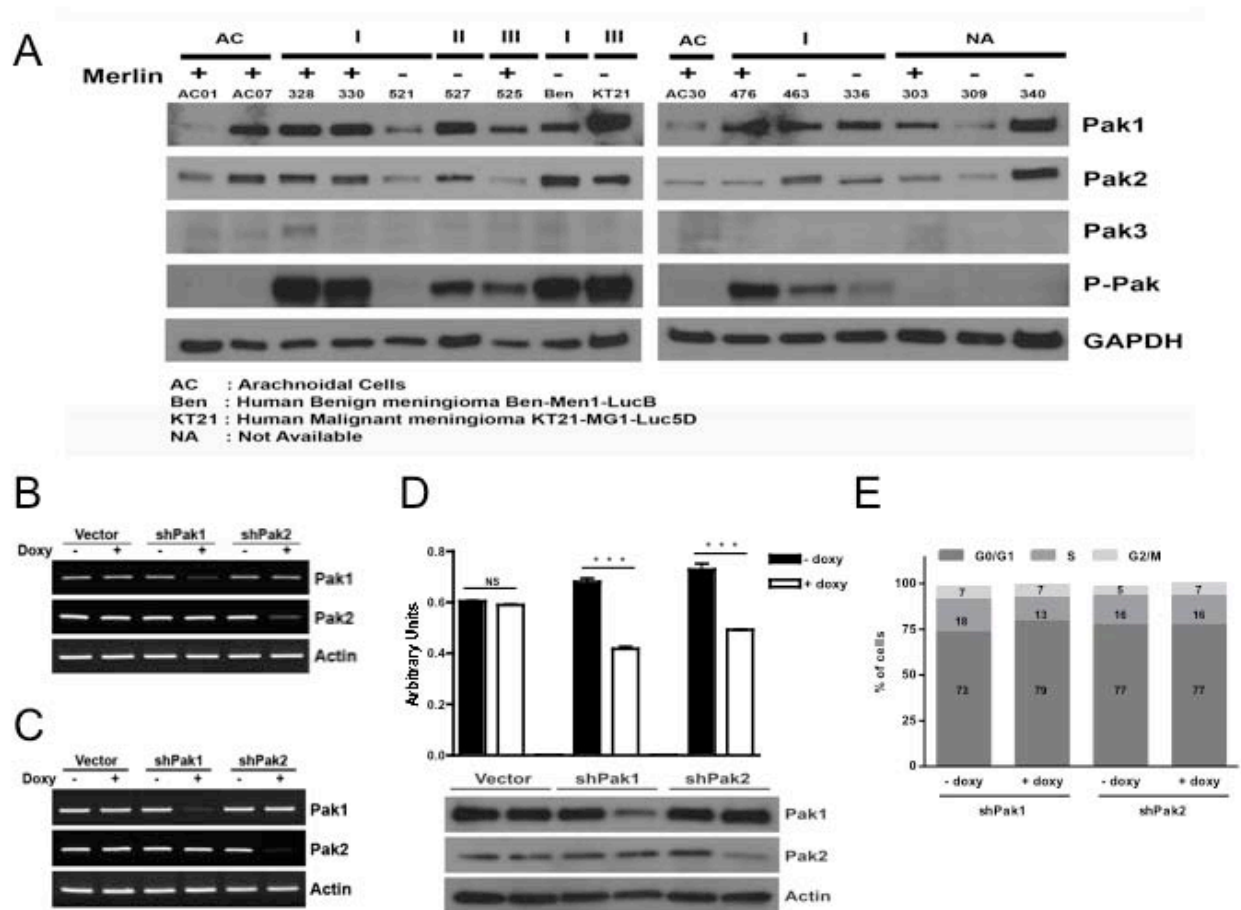

**Supplementary Figure S1: Contribution of Pak1 and Pak2 to cell proliferation as well as tumor growth in Ben-Men meningioma cells.** (A) Immunoblot analysis of a panel of primary meningioma and arachnoidal cells probed with Pak1, Pak2 and Pak3. NA, information not available. (B) RT-PCR analysis of *Pak1* and *Pak2* transcripts in shRNA-transduced KT21 cells at 48 hours upon addition of doxycycline. (C) RT-PCR analysis of *Pak1* and *Pak2* transcripts in shRNA-transduced Ben-Men cells at 48 hours upon addition of doxycycline. (D) Proliferation of Ben-Men cells after infection with shRNA was measured by MTT assay. Immunoblot analysis showed loss of Pak1 and Pak2 in shRNA-transduced cells. (E) Cells bearing shPak1 and shPak2 were stained with propidium iodide and subjected to cell cycle analysis by flow cytometry. Data are representative of 3 independent experiments. \*\*\* $P < 0.0005$ , student's *t*-test. NS, not significant.

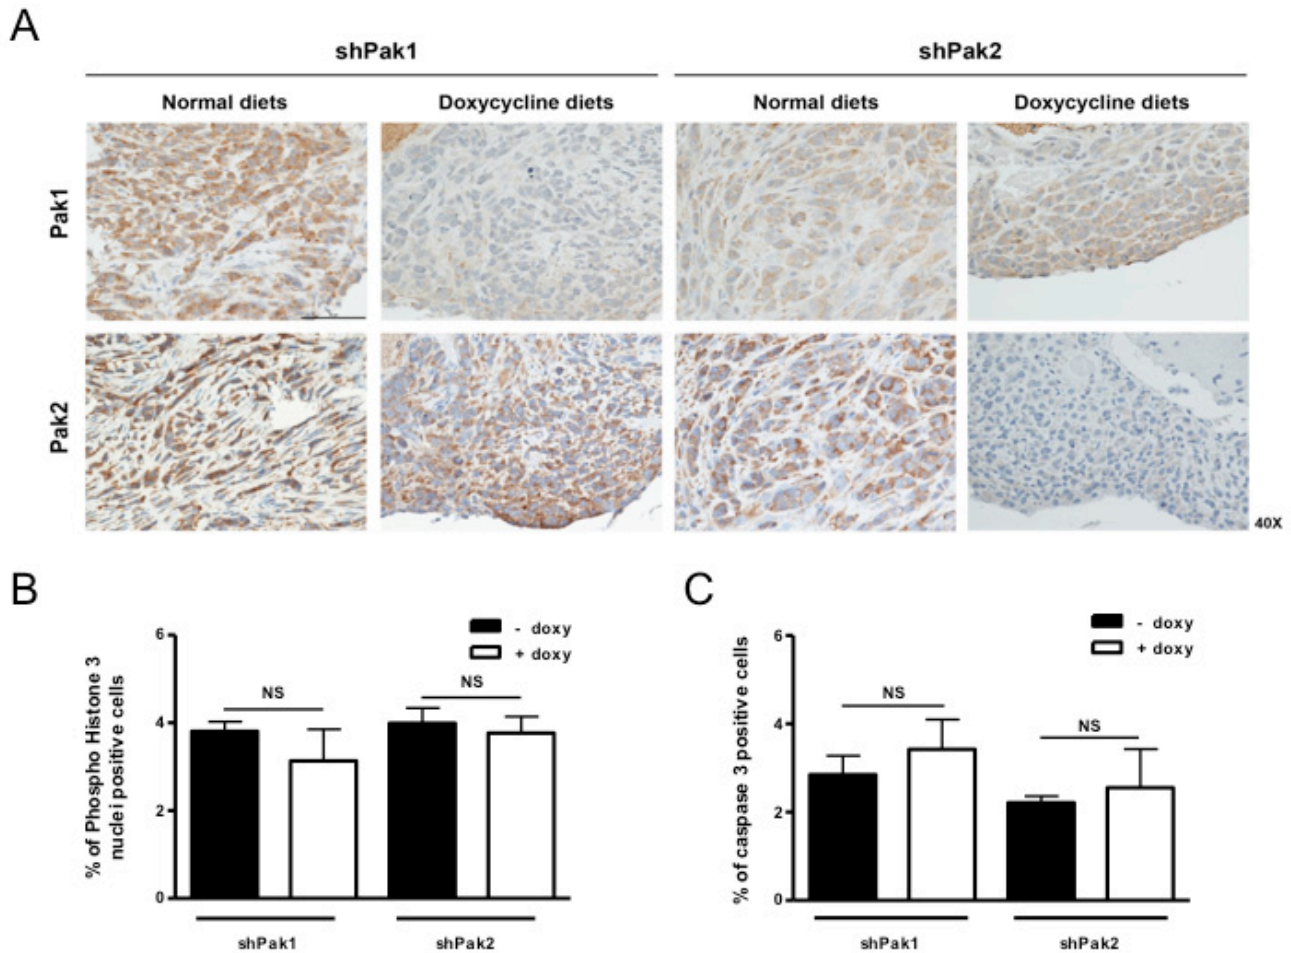

**Supplementary Figure S2: Immunohistochemical analysis of brain tissue transplanted with KT21-MG1 meningioma cells carrying either shPak1 or shPak2 after feeding with doxycycline diets or normal rodent foods for 5 weeks. (A)** Transplanted brain were sectioned and immunostained for Pak1 and Pak2. Scale bar = 100  $\mu$ m. **(B)** Quantitation of positive cells for phospho-histone 3 was calculated after Aperio Scanscope analysis. **(C)** Quantitation of positive cells for cleaved caspase 3 was calculated after Aperio Scanscope analysis. NS, not significant.

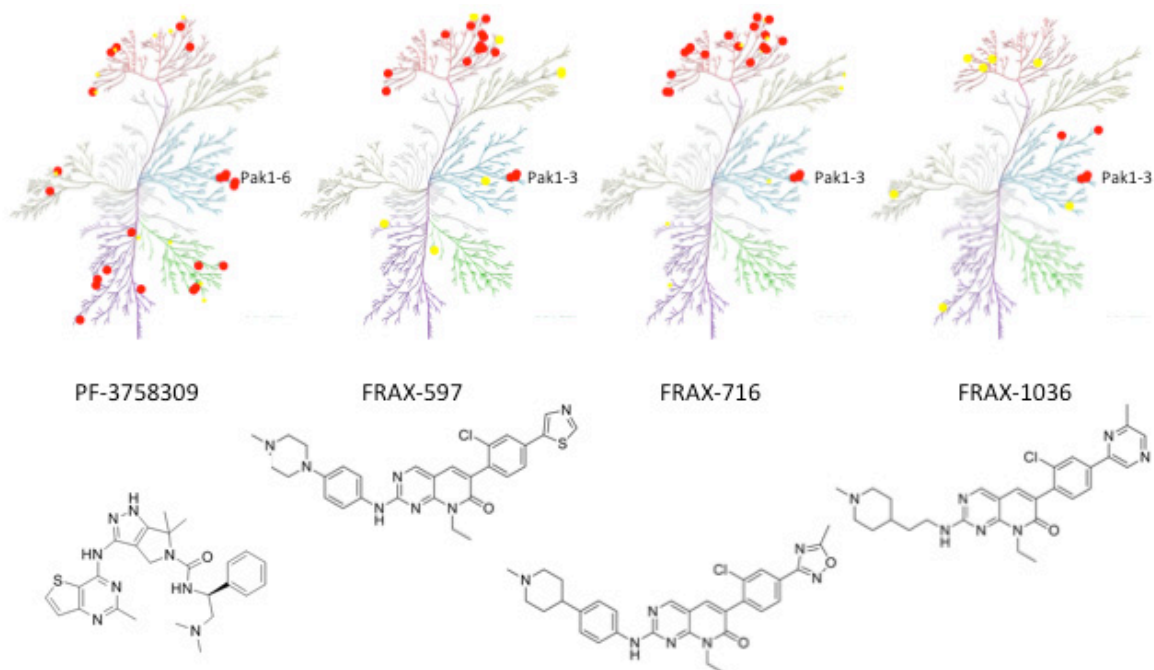

**Supplementary Figure S3: Specificity of Pak inhibitors.** 1  $\mu\text{g}$  recombinant kinase was incubated at 30°C for 20 min in protein kinase buffer containing 1  $\mu\text{M}$  ATP plus 1  $\mu\text{Ci}$   $\gamma\text{-}^{32}\text{P}\text{-ATP}$  (6000 C/mMol), in the presence of 1  $\mu\text{M}$  of the indicated compounds and 1  $\mu\text{g}$  myelin basic protein. The reaction was terminated with 10% TCA and kinase activity was assessed by incorporation of  $^{32}\text{P}$  into myelin basic protein. The diagram represents the kinome family tree. Red spheres, >75% inhibition; yellow spheres, >50% inhibition.

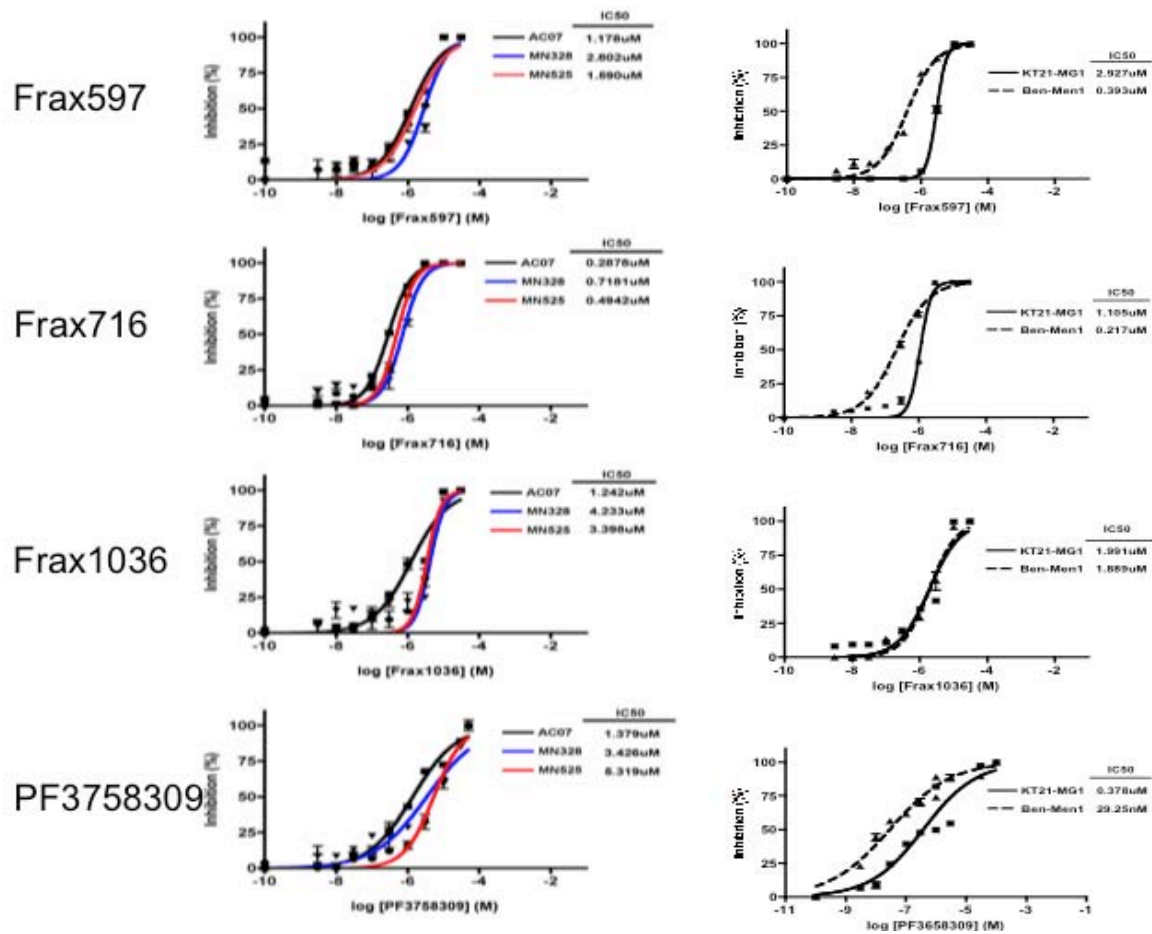

**Supplementary Figure S4: Growth inhibition induced by Pak inhibitors.** Arachnoid cell (AC07) and meningioma cells were treated with various concentrations of inhibitors for 72 hours, and MTT assay was subsequently performed. Data are presented as a percentage of the control, in which cells were treated with DMSO. Points represent the mean of three independent experiments  $\pm$  standard error.

### Mice transplanted with KT21 meningioma cells for 4 months

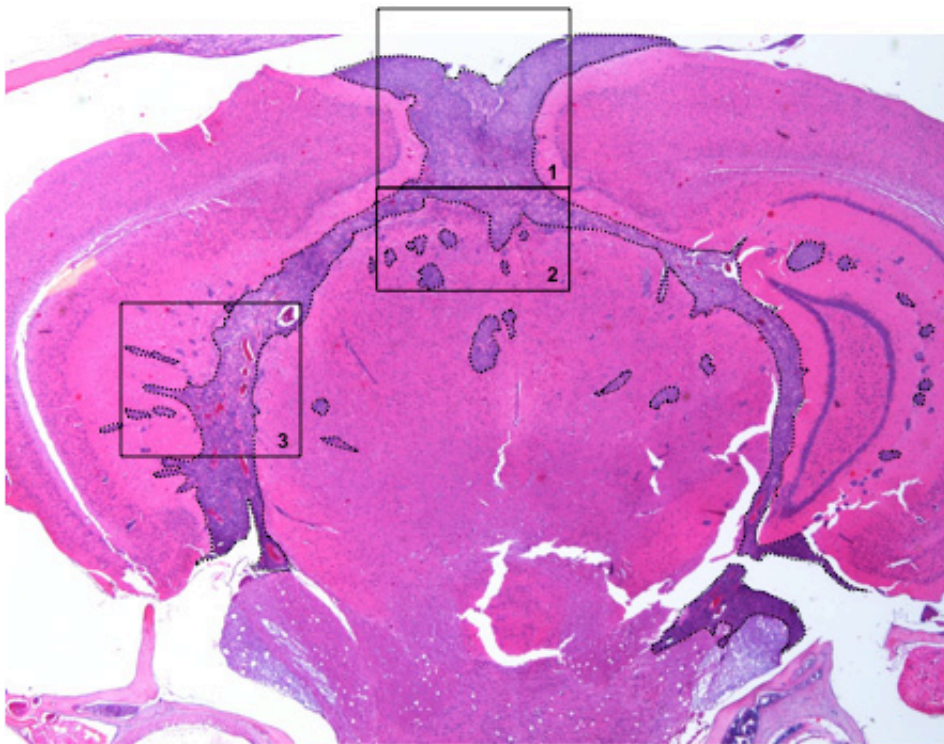

Interhemispheric fissure (magnification X2)

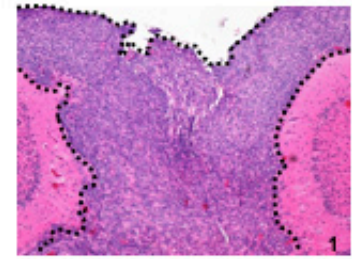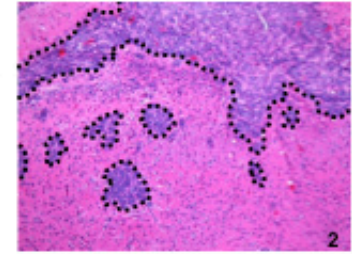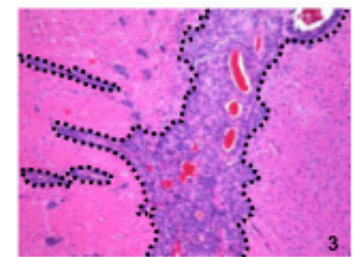

magnification X10

Supplementary Figure S5: Hematoxylin and eosin staining of brain from xenograft-bearing mouse 4 months after transplantation of KT21 meningioma cells.

A

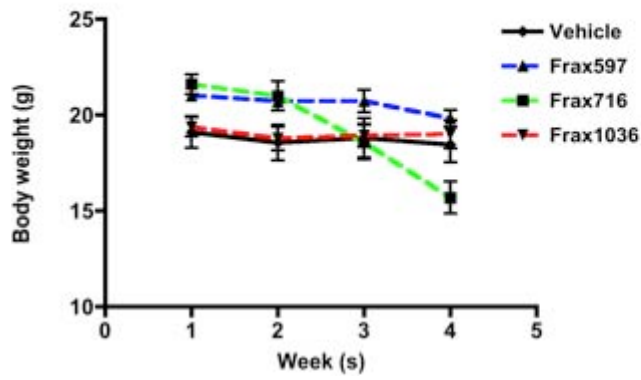

B

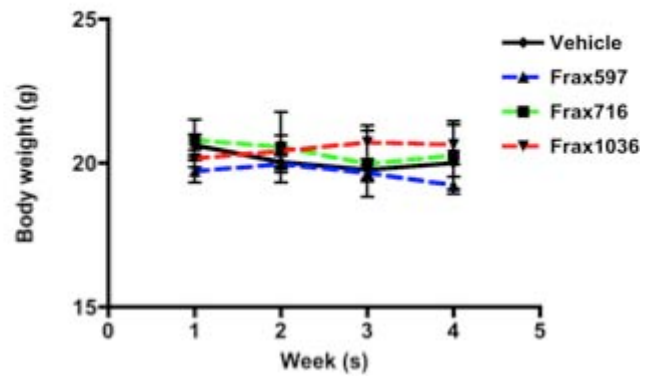

Supplementary Figure S6: Body weight of mice bearing KT21 (A) or Ben-Men (B) cells treated with Pak inhibitors in orthotopic meningioma model.

**Supplementary Table S1. % inhibition of activity**

| Kinase by family      | Family | PF3758309 | FRAX716 | FRAX1036 | FRAX1036 |
|-----------------------|--------|-----------|---------|----------|----------|
| PAK1                  | STE    | 100       | 95      | 101      | 101      |
| PAK3                  | STE    | 100       | 90      | 106      | 106      |
| PAK2 (PAK65)          | STE    | 100       | 100     | 98       | 98       |
| PAK4                  | STE    | 99        | 7       | 6        | 6        |
| PAK7 (KIAA 1264)      | STE    | 99        | 17      | 9        | 9        |
| PAK6                  | STE    | 98        | 17      | 27       | 27       |
| MAP2K1 (MEK1)         | STE    | 39        | 48      | 27       | 27       |
| MAP2K2 (MEK2)         | STE    | 20        | 79      | 15       | 15       |
| CSNK1D (CK1 delta)    | CK1    | 3         | 6       | 11       | 11       |
| CSNK1G2 (CK1 gamma 2) | CK1    | 9         | 3       | 3        | 3        |
| ADRBK1 (GRK2)         | AGC    | 10        | 10      | 0        | 0        |
| ADRBK2 (GRK3)         | AGC    | 4         | 2       | -1       | -1       |
| PDK1 Direct           | AGC    | 67        | 15      | 0        | 0        |
| RP88KA8 (RSK2)        | AGC    | 100       | 6       | 11       | 11       |
| RP88KB1 (p70S6K)      | AGC    | 79        | 1       | 10       | 10       |
| RSK3                  | AGC    |           |         | 26       | 26       |
| RSK4                  | AGC    |           |         | 9        | 9        |
| AKT2 (PKB beta)       | AGC    | 0         | 9       |          |          |
| AKT1 (PKB alpha)      | AGC    | 16        | 1       | 0        | 0        |
| PRKCE (PKC epsilon)   | AGC    | 62        | 14      | 25       | 25       |
| PRKCB1 (PKC beta I)   | AGC    | 58        | 9       | 18       | 18       |
| PRKCQ (PKC theta)     | AGC    | 97        | 12      | 24       | 24       |
| PRKACA (PKA)          | AGC    | 100       | 7       | 1        | 1        |
| ROCK1                 | AGC    | 5         | 2       | -2       | -2       |
| ROCK2                 | AGC    | 10        | 4       | 7        | 7        |
| CHEK2 (CHK2)          | CAMK   | 99        | 17      | 7        | 7        |
| MAPKAPK2              | CAMK   | 1         | 7       | 0        | 0        |
| AMPKA1/B1/G1          | CAMK   | 100       | 13      |          |          |
| AMPKA2/B1/G1          | CAMK   | 100       | 29      |          |          |
| MARK3                 | CAMK   | 100       | 16      | 24       | 24       |

(Continued)

|                               |          | PF3758309 | FRAX716 | FRAX1036 | FRAX1036 |
|-------------------------------|----------|-----------|---------|----------|----------|
| STK22D (TSSK1)                | CAMK     | 90        | 5       | 12       | 12       |
| PIM2                          | CAMK     | 4         | 1       | 3        | 3        |
| PIM1                          | CAMK     | 6         | -4      | 0        | 0        |
| CHEK1 (CHK1)                  | CAMK     | 91        | -2      | -14      | -14      |
| CDK9/cyclin T1                | CMGC     | 13        | 3       | -8       | -8       |
| CDK6/p25                      | CMGC     | 18        | 3       |          |          |
| CDK5/p35                      | CMGC     | 15        | 2       | 7        | 7        |
| CDK1/cyclin B                 | CMGC     | 12        | 3       | 6        | 6        |
| CDK2/cyclin A                 | CMGC     | 22        | 0       | -14      | -14      |
| CDK7/cyclin H/<br>MNAT1       | CMGC     | 96        | 2       | -3       | -3       |
| MAPK9 (JNK2)                  | CMGC     | 0         | 20      | 44       | 44       |
| MAPK10 (JNK3)                 | CMGC     | 5         | 12      | 45       | 45       |
| MAPK8 (JNK1)                  | CMGC     | 9         | 30      | 79       | 79       |
| MAPK14 (p38<br>alpha) Direct  | CMGC     | 7         | 10      | 0        | 0        |
| MAPK11<br>(p38 beta)          | CMGC     | 8         | 2       | 6        | 6        |
| MAPK1 (ERK2)                  | CMGC     | 23        | 7       | 5        | 5        |
| MAPK3 (ERK1)                  | CMGC     | 18        | 8       | 4        | 4        |
| G3K3A<br>(G3K3 alpha)         | CMGC     | 52        | -9      | 7        | 7        |
| G3K3B<br>(G3K3 beta)          | CMGC     | 77        | 14      | 0        | 0        |
| DYRK1A                        | CMGC     | 6         | 3       | 5        | 5        |
| DYRK1B                        | CMGC     | 7         | 13      |          |          |
| FRAP1 (mTOR)                  | ATYPICAL | 0         | 1       | 0        | 0        |
| P1K3CA/PIK3R1<br>(p110 alpha) | ATYPICAL | 0         | -1      | 0        | 0        |
| P1K3CA (p110<br>gamma)        | ATYPICAL | 0         | 0       | 0        | 0        |
| P1K3C2B (P13K-<br>C2-beta)    | ATYPICAL | 8         | -1      | 2        | 2        |
| SPHK1                         | ATYPICAL | 4         | -3      | 0        | 0        |
| ABL1                          | TK       | 62        | 93      | 18       | 18       |
| ABL2 (Arg)                    | TK       | 77        | 82      |          |          |
| BTK                           | TK       | 74        | 87      | 5        | 5        |
| ITK                           | TK       | 23        | 84      | 0        | 0        |
| LYNA                          | TK       | 76        | 88      | 39       | 39       |

(Continued)



|                         |     | PF3758309 | FRAX716 | FRAX1036 | FRAX1036 |
|-------------------------|-----|-----------|---------|----------|----------|
| SRC                     | TK  | 74        | 97      | 16       | 16       |
| YES1                    | TK  | 86        | 89      | 18       | 18       |
| EPHA2                   | TK  | 18        | 68      | 18       | 18       |
| PTK1 (FAK)              | TK  | 38        | 22      | 9        | 9        |
| SYK                     | TK  | 32        | 21      | 4        | 4        |
| ZAP70                   | TK  | 10        | 8       | 3        | 3        |
| ALK                     | TK  |           |         |          |          |
| INSR                    | TK  | 7         | 14      | 0        | 0        |
| IGF1R                   | TK  | 10        | 23      | 7        | 7        |
| NTRK1 (TRKA)            | TK  | 73        | 92      |          |          |
| MST1R (RON)             | TK  | 8         | 40      | 55       | 55       |
| MET (cMet)              | TK  | 19        | 38      | 36       | 36       |
| AXL                     | TK  | 67        | 45      | 21       | 21       |
| RET                     | TK  | 81        | 91      | 8        | 8        |
| FGFR2                   | TK  | 72        | 60      | 15       | 15       |
| FGFR3                   | TK  | 31        | 35      | 0        | 0        |
| FGFR4                   | TK  | 11        | 20      | 9        | 9        |
| FLT1 (VEGFR1)           | TK  | 5         | 37      | 14       | 14       |
| KDR (VEGFR2)            | TK  | 20        | 90      | 16       | 16       |
| CSF1R (FMS)             | TK  | 20        | 97      | 41       | 41       |
| KIT                     | TK  | 7         | 77      | 32       | 32       |
| FLT3                    | TK  | 78        | 92      | 10       | 10       |
| PDGFRA (PDGFR alpha)    | TK  | 2         | 95      | 2        | 2        |
| PDGFRB (PDGFR beta)     | TK  | 14        | 82      | 83       | 83       |
| TEK (Tie2)              | TK  | 0         | 98      | 2        | 2        |
| EGFR (ErbB1)            | TK  | 4         | 20      | 2        | 2        |
| ERBB2 (HER2)            | TK  | 4         | 8       | 2        | 2        |
| ERBB4 (HER4)            | TK  | 2         | 77      | 0        | 0        |
| JAK1                    | TK  | 2         | 1       | 1        | 1        |
| TYK2                    | TK  | 14        | 54      | 6        | 6        |
| JAK2                    | TK  | 14        | 7       | 0        | 0        |
| JAK3                    | TK  | 10        | 3       | 0        | 0        |
| RAF1 (cRAF) Y340D Y341D | TKL | 26        | 74      | 11       | 11       |
| BRAF                    | TKL | 52        | 72      | 7        | 7        |
| ACVR1B (ALK4)           | TKL | 1         | -9      | 0        | 0        |
